# Supplementary material for: Phosphorescence enhancement of pyridinium macrocycles by poly(vinylalcohol)
Source: Royal Society of Chemistry journal article supplement (doi:10.1039/d3cc03225f), 2023-01-01
Supplement: d3cc03225f1.pdf [file d3cc03225f1.pdf]

## Supporting Information

### Phosphorescence Enhancement of Pyridinium Macrocycles by Poly(vinylalcohol)

*Zhi-Yuan Zhang<sup>+,a</sup>, Chun-Yun Deng<sup>+,a</sup>, Chen-Chen Shen,<sup>a</sup> Rong-Yao Xu,<sup>a</sup> Xi-Zhen Wang,<sup>a</sup> Yan-Hao Wang,<sup>a</sup> Bo Ding,<sup>a</sup> Bin Li,<sup>a</sup> Jian Li,<sup>b</sup> and Chunju Li<sup>\*,a</sup>*

a. Tianjin Key Laboratory of Structure and Performance for Functional Molecules, College of Chemistry, Tianjin Normal University, Tianjin 300387 (P. R. China).

b. School of Chemistry and Chemical Engineering, Henan Normal University, P. R. China.

+ . These authors contributed equally to this work.

#### Corresponding Author

\*E-mail: [cjli@shu.edu.cn](mailto:cjli@shu.edu.cn)

## Section I. Materials/Methods/Instrumentation

All reagents and solvents were commercially available and used without further purification, unless otherwise noted.  $^1\text{H}$  NMR spectra were recorded using a Bruker Avance 400 MHz spectrometer. Photoluminescence spectra and lifetime were obtained on FLS1000. Fluorescence and phosphorescence quantum efficiencies were measured on HAMAMATSU C9920-02. The electrostatic potential maps of  $\text{PC}\cdot 2\text{Cl}$  and PVA were performed by using Gaussian 09 program with B3LYP-D3(BJ)/6-31G + (d, p) level.

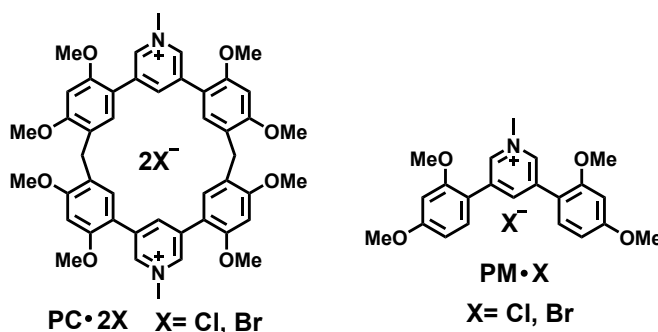

**Scheme S1.** The structures of macrocycles  $\text{PC}\cdot 2\text{X}$  and monomers  $\text{PM}\cdot \text{X}$  ( $\text{X} = \text{Cl}, \text{Br}$ ).

### Preparation of the doped films

In a typical example, 40 mg PVA was dissolved in 100 mL water at  $90^\circ\text{C}$  to obtain an PVA aqueous solution of 40 mg/mL. Different proportions (i.e., 1/200, 1/100, 1/50, 1/25 and 1/10) of films were prepared by dissolving different amount of  $\text{PC}\cdot 2\text{Cl}$  (i.e., 0.2, 0.4, 0.8, 1.6, and 4 mg) in 1 mL PVA aqueous solution. Then, the mixed droplets were coated on  $20\text{ mm}\times 50\text{ mm}$  glasses and dried at  $60^\circ\text{C}$  to obtain transparent and flexible films.

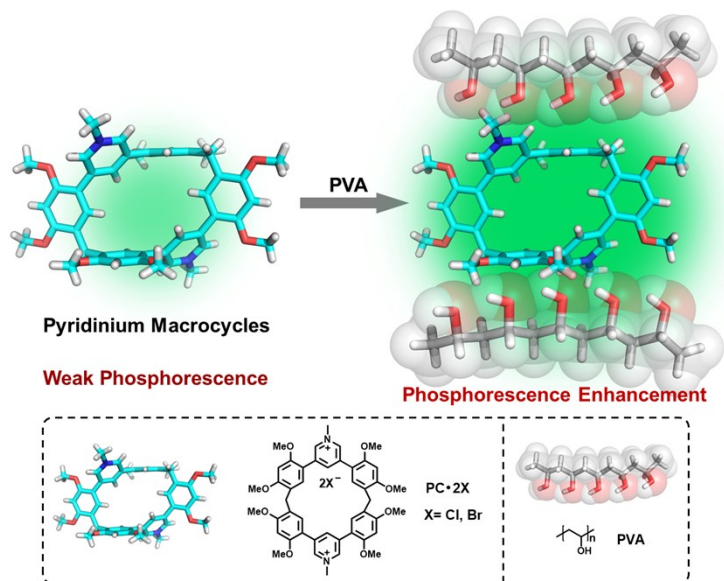

**Scheme S2.** Schematic illustration of the phosphorescence enhancement of pyridinium macrocycles by PVA.

## Section II. Photophysical properties

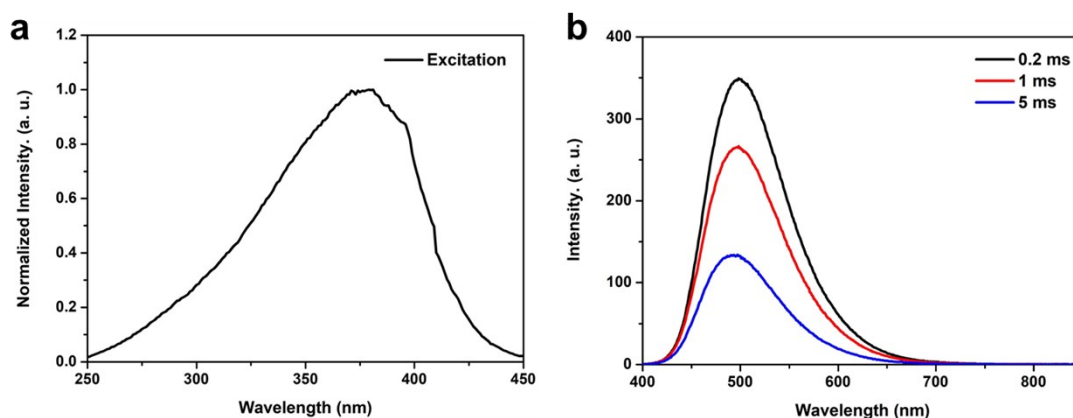

**Figure S1.** (a) Excitation spectra of PC•2Cl@PVA film at 498 nm; (b) Delayed PL spectra of PC•2Cl@PVA film with delay time of 0.2, 1 and 5 ms at 298 K ( $\lambda_{\text{ex}}$ : 380 nm).

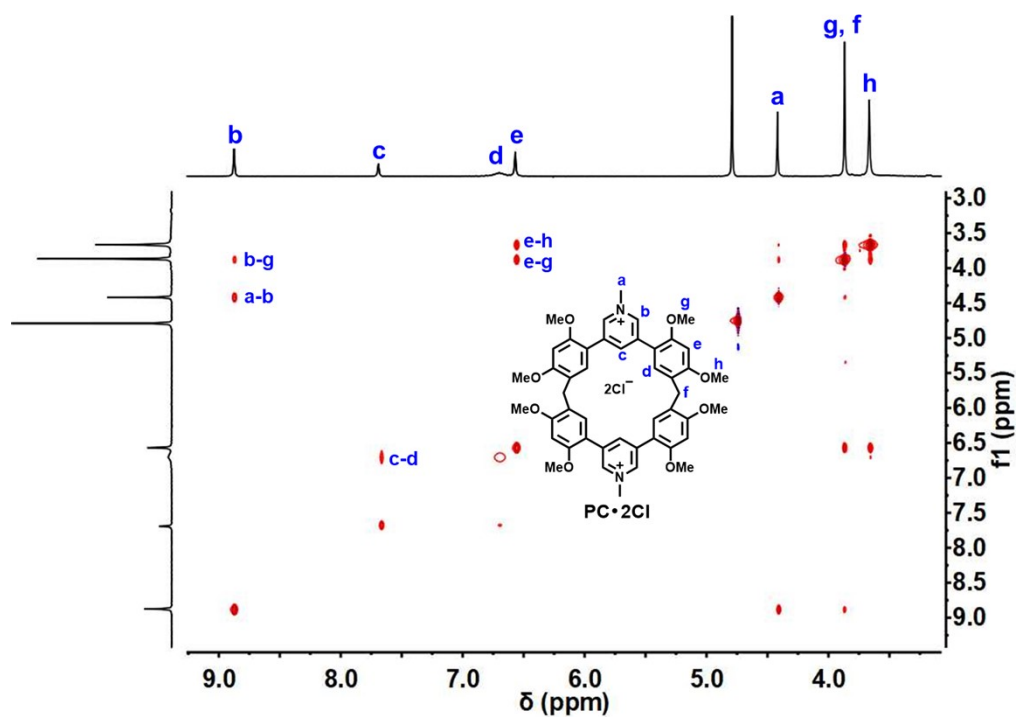

**Figure S2.**  $^1\text{H}$ - $^1\text{H}$  NOESY NMR spectrum (400 MHz,  $\text{D}_2\text{O}$ , 298 K) of  $\text{PC}\cdot 2\text{Cl}$ .

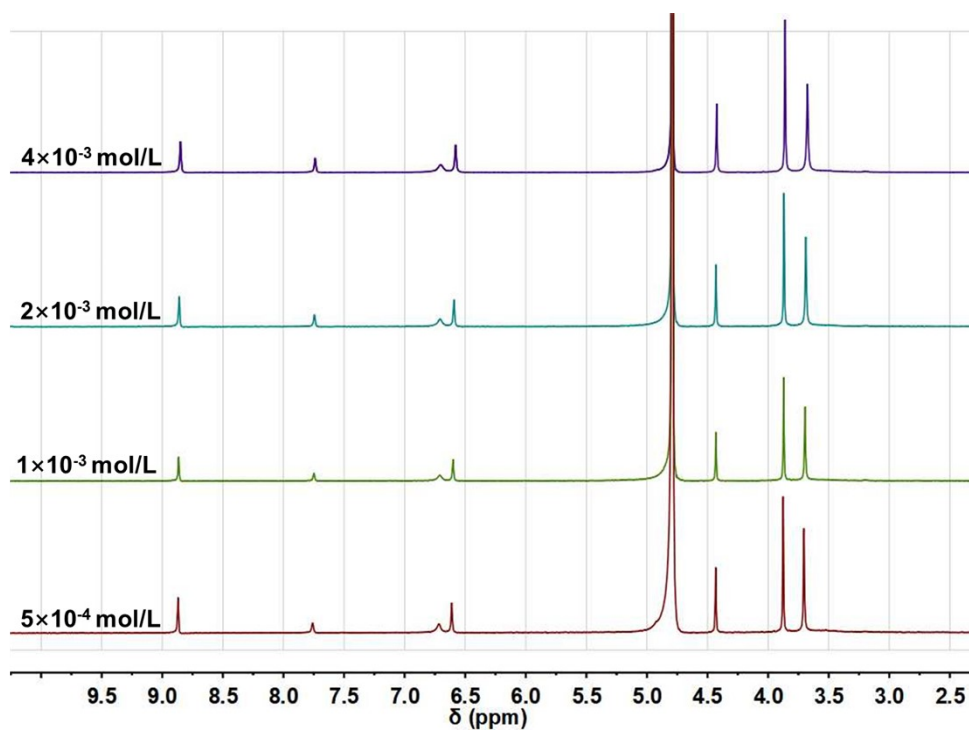

**Figure S3.**  $^1\text{H}$  NMR spectra of  $\text{PC}\cdot 2\text{Cl}$  in different concentrations ( $\text{D}_2\text{O}$ ).

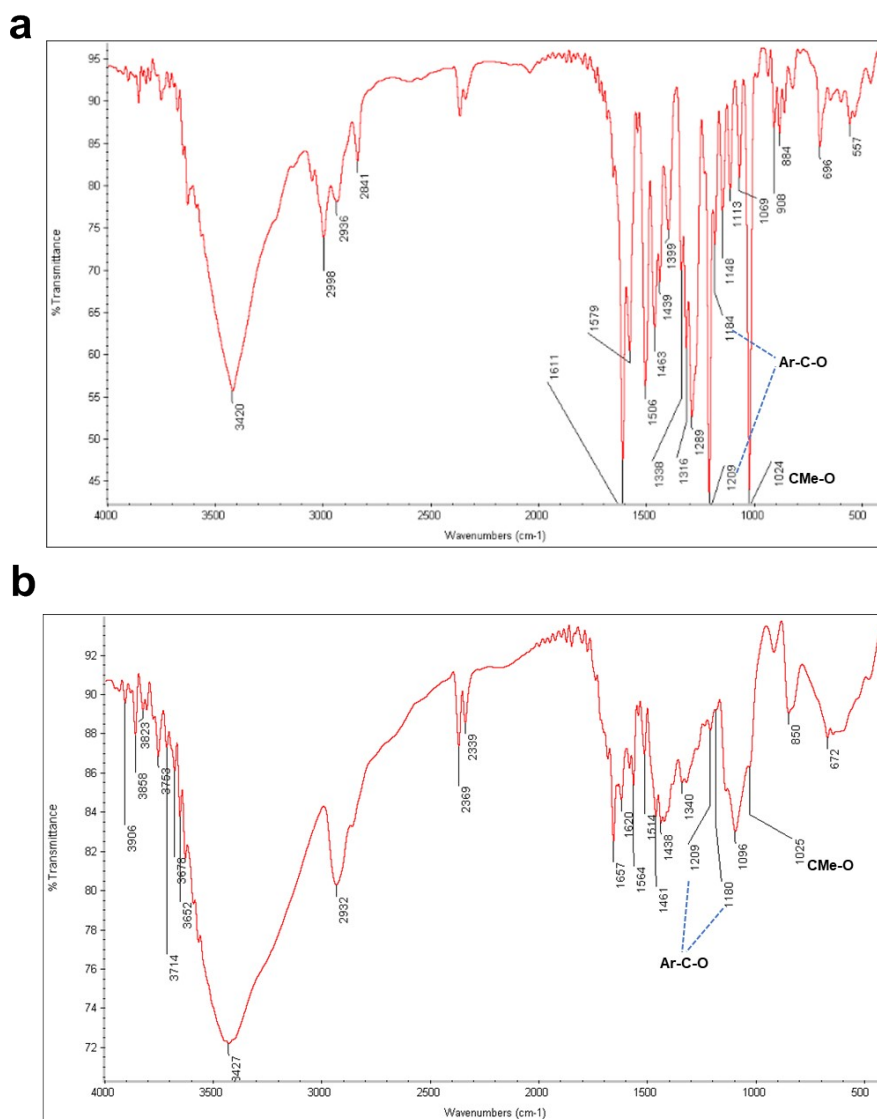

**Figure S4.** FTIR spectra of (a) PC•2Cl and (b) PC•2Cl@PVA film.

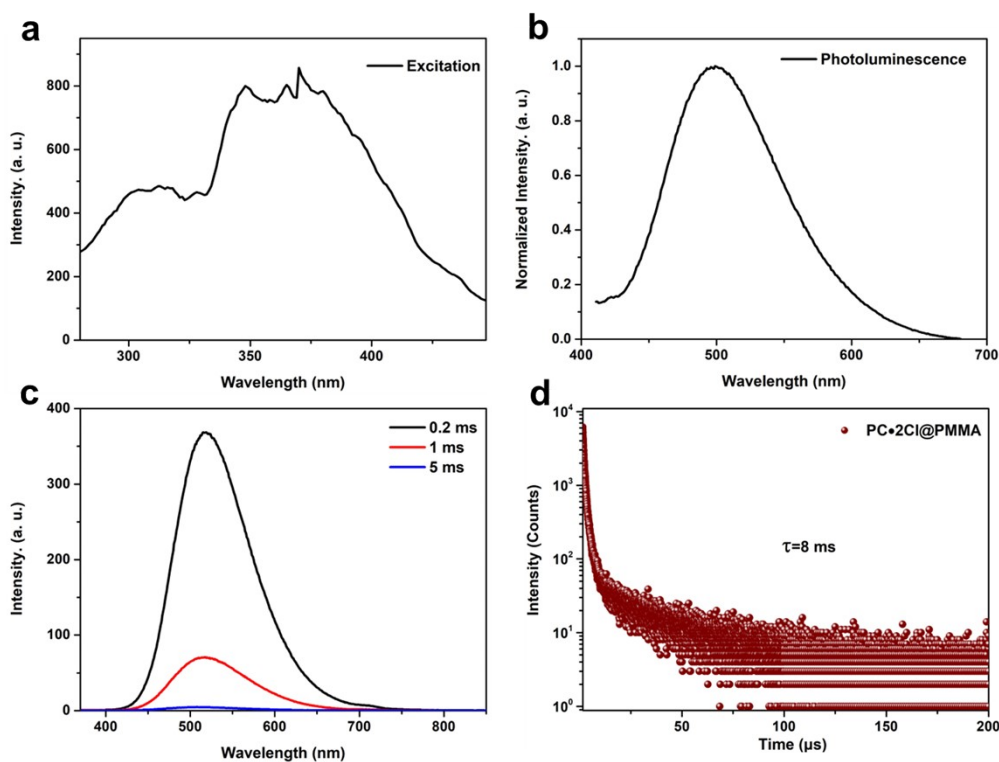

**Figure S5.** (a) Excitation spectra of PC•2Cl@PMMA film at 498 nm; (b) Photoluminescence spectra of PC•2Cl@PMMA film under 350 nm excitation; (c) Delayed PL spectra of PC•2Cl@PMMA film with delay time of 0.2, 1 and 5 ms at 298 K under 350 nm excitation; (d) Time-resolved PL decay of PC•2Cl@PMMA film @520 nm in solid state at room temperature.

To evaluate other polymers, we have prepared and tested the photophysical properties of PC•2Cl@PMMA and PC•2Cl@EVOH films with the proportion of 1/100. PC•2Cl@PMMA has a lifetime of 8 ms, indicated that PMMA is not a good matrix, possibly because weaker hydrogen-bonding interactions (Figure S5). For PC•2Cl@EVOH, the lifetime is only 68 ms, shorter than PC•2Cl@PVA (92 ms), proved that the reduction of hydrogen-bonding ratio is detrimental to phosphorescence (Figure S6). All results revealed that PVA is the best matrix because of multiple hydrogen bonding sites.

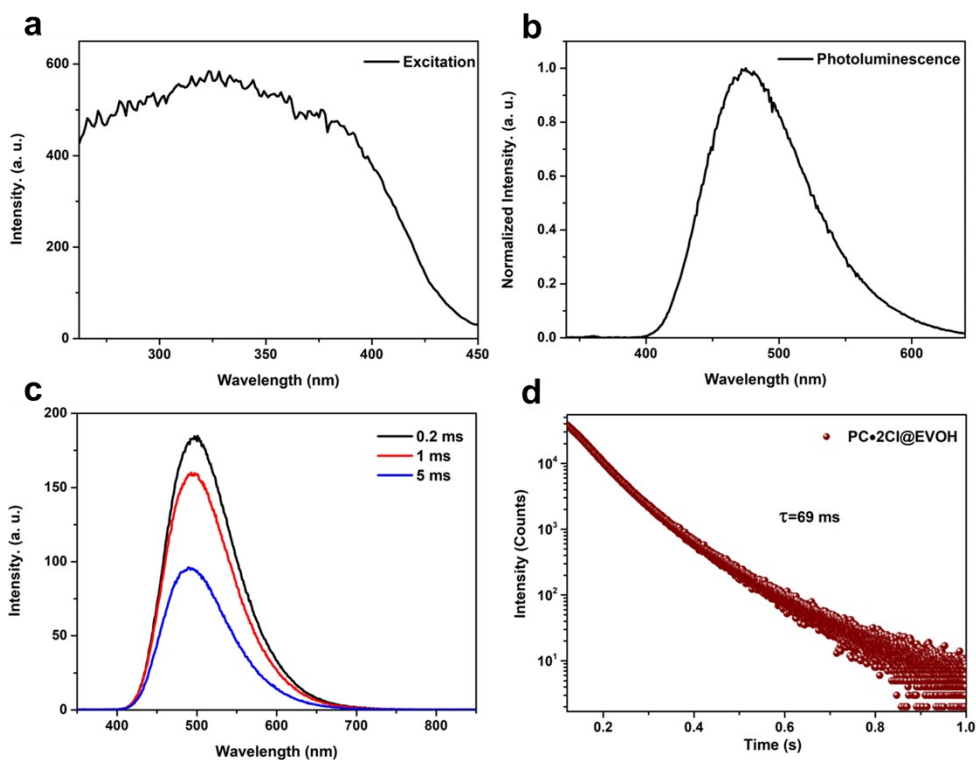

**Figure S6.** (a) Excitation spectra of PC•2Cl@EVOH film at 475 nm; (b) Photoluminescence spectra of PC•2Cl@EVOH film under 325 nm excitation; (c) Delayed PL spectra of PC•2Cl@EVOH film with delay time of 0.2, 1 and 5 ms at 298 K under 325 nm excitation; (d) Time-resolved PL decay of PC•2Cl@EVOH film @500 nm in solid state at room temperature.

**Table S1.** Photophysical data of macrocycles and monomers in the solid states (PC•2Cl/Br and PM•Cl/Br) and in the PVA films (PC•2Cl/Br@PVA and PM•Cl/Br@PVA)

| Entry | Samples             | $\lambda_F$<br>(nm) | $\lambda_P$<br>(nm) | $\tau_F$<br>(ns) | $\tau_P$<br>(ms) | $\Phi_F$<br>(%) | $\Phi_P$<br>(%) | $K_r^F$ (s <sup>-1</sup> ) <sup>b</sup> | $K_{nr}^F$ (s <sup>-1</sup> ) <sup>d</sup> | $K_r^P$ (s <sup>-1</sup> ) <sup>e</sup> | $K_{nr}^P$ (s <sup>-1</sup> ) <sup>f</sup> |
|-------|---------------------|---------------------|---------------------|------------------|------------------|-----------------|-----------------|-----------------------------------------|--------------------------------------------|-----------------------------------------|--------------------------------------------|
| 1     | PC•2Cl@PVA          | - <sup>a</sup>      | 498                 | - <sup>a</sup>   | 92               | 0               | 32              | - <sup>c</sup>                          | - <sup>c</sup>                             | 3.5                                     | 7.4                                        |
| 2     | PC•2Cl <sup>§</sup> | 470                 | 518                 | 9.45             | 16.7             | 14.6            | 18.6            | $1.5 \times 10^7$                       | $7.1 \times 10^7$                          | 11                                      | 49                                         |
| 3     | PM•Cl@PVA           | 458                 | 487                 | 8.2              | 218              | 14.1            | 24.3            | $1.7 \times 10^7$                       | $7.5 \times 10^7$                          | 1.1                                     | 3.5                                        |
| 4     | PM•Cl <sup>§</sup>  | 470                 | 500                 | 14.1             | 0.29             | 10.4            | 17.3            | $7.4 \times 10^6$                       | $5.1 \times 10^7$                          | 597                                     | $2.8 \times 10^3$                          |
| 5     | PC•2Br@PVA          | - <sup>a</sup>      | 498                 | - <sup>a</sup>   | 110              | 0               | 28              | - <sup>c</sup>                          | - <sup>c</sup>                             | 2.6                                     | 6.6                                        |
| 6     | PC•2Br <sup>§</sup> | 481                 | 522                 | 8.0              | 7.00             | 4.2             | 7.2             | $5.2 \times 10^6$                       | $1.1 \times 10^8$                          | 10                                      | 133                                        |
| 7     | PM•Br@PVA           | 464                 | 487                 | 8.6              | 286              | 14              | 23.6            | $1.6 \times 10^7$                       | $7.3 \times 10^7$                          | 0.8                                     | 2.7                                        |
| 8     | PM•Br <sup>§</sup>  | 470                 | 503                 | 5.6              | 0.16             | 3.9             | 5.9             | $7.0 \times 10^6$                       | $1.6 \times 10^8$                          | 369                                     | $5.9 \times 10^3$                          |

a: Not detected. b: The radiative decay rate constant of fluorescence  $k_r^F = \Phi_F/\tau_F$ . c: Not calculated. d: The singlet state

nonradiative decay rate constant of fluorescence  $k_{nr}^F = (1 - \Phi_F - \Phi_P)/\tau_F$ . e: The radiative decay rate constant of

phosphorescence  $k_r^p = \Phi_p/\tau_p$ . f: The triplet state nonradiative decay rate constant  $k_{nr}^p = (1 - \Phi_p)/\tau_p$ . g: Data from our previous work.<sup>1</sup>

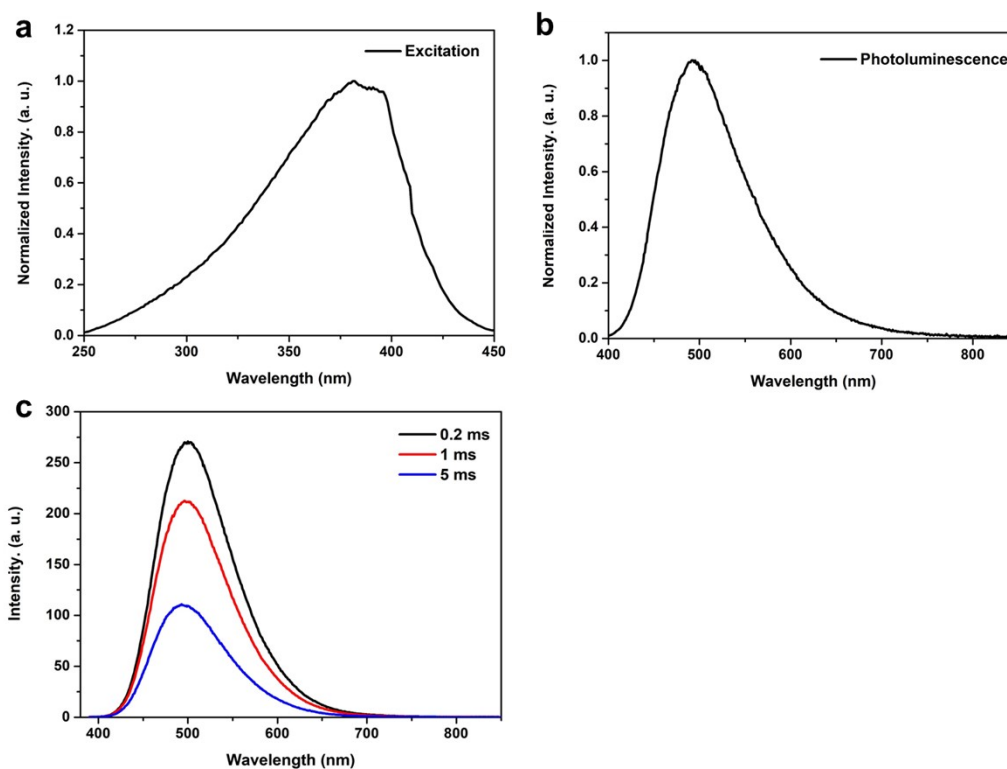

**Figure S7.** (a) Excitation spectra of PC•2Br@PVA film at 498 nm; (b) Photoluminescence spectra of PC•2Br@PVA film under 380 nm excitation; (c) Delayed PL spectra of PC•2Br@PVA film with delay time of 0.2, 1 and 5 ms at 298 K ( $\lambda_{ex}$ : 380 nm).

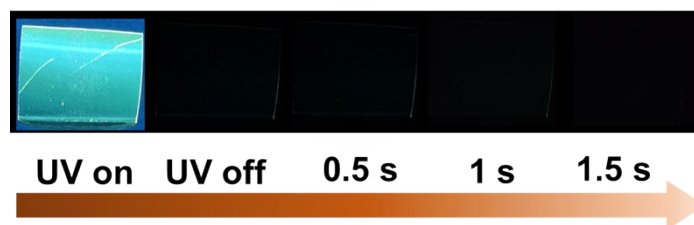

**Figure S8.** Luminescence photographs of PC•2PF<sub>6</sub>@PVA film under 365 nm light and at different time intervals after ceasing irradiation.



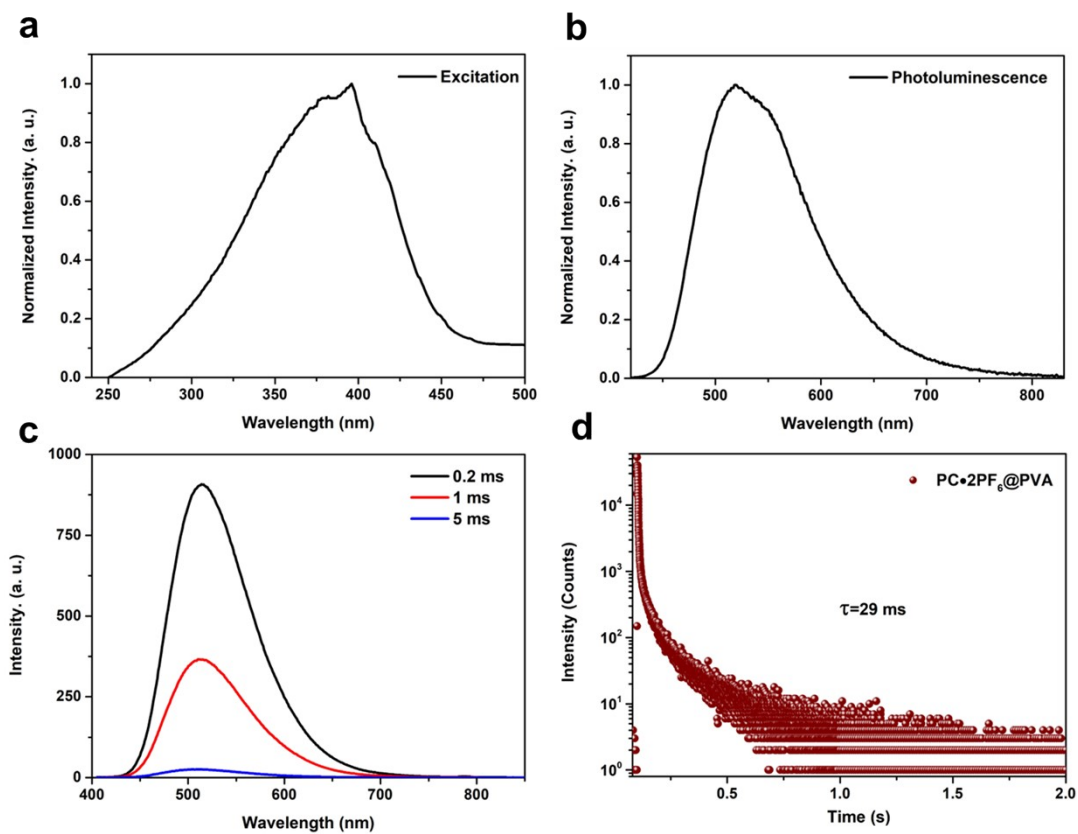

**Figure S9.** (a) Excitation spectra of PC•2PF<sub>6</sub>@PVA film at 520 nm; (b) Photoluminescence spectra of PC•2PF<sub>6</sub>@PVA film under 395 nm excitation; (c) Delayed PL spectra of PC•2PF<sub>6</sub>@PVA film with delay time of 0.2, 1 and 5 ms at 298 K under 395 nm excitation; (d) Time-resolved PL decay of PC•2PF<sub>6</sub>@PVA film @520 nm in solid state at room temperature.

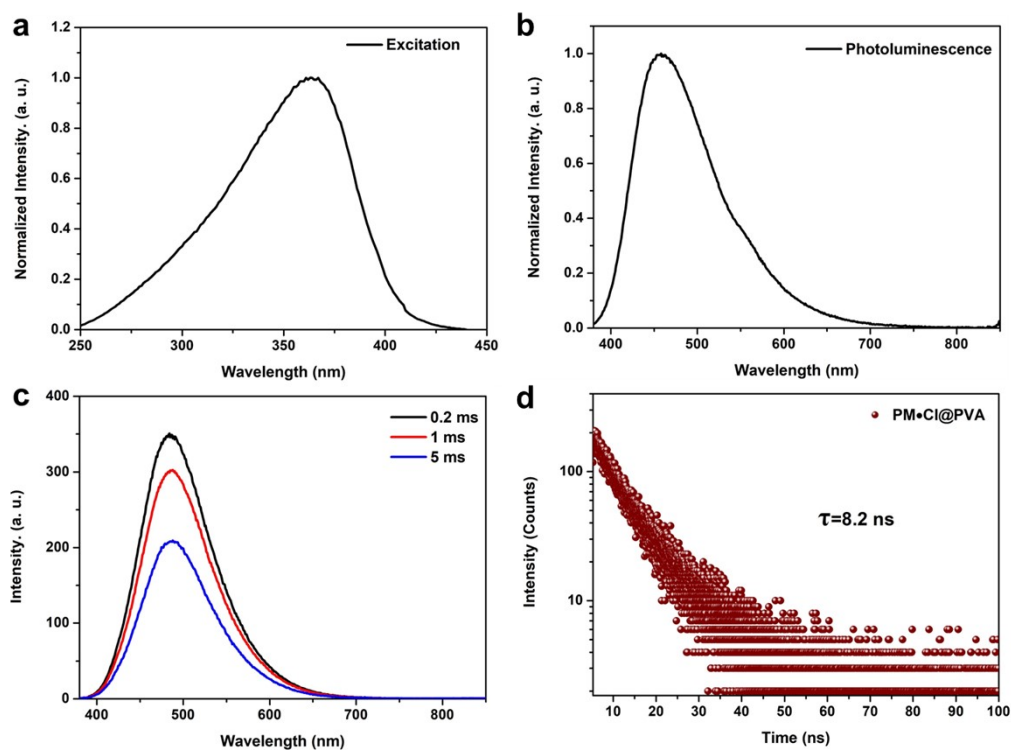

**Figure S10.** (a) Excitation spectra of PM•Cl@PVA film at 458 nm; (b) Photoluminescence spectra of PM•Cl@PVA film under 364 nm excitation; (c) Delayed PL spectra of PM•Cl@PVA film with delay time of 0.2, 1 and 5 ms at 298 K under 364 nm excitation; (d) Time-resolved PL decay of PM•Cl@PVA film @458 nm in solid at room temperature.

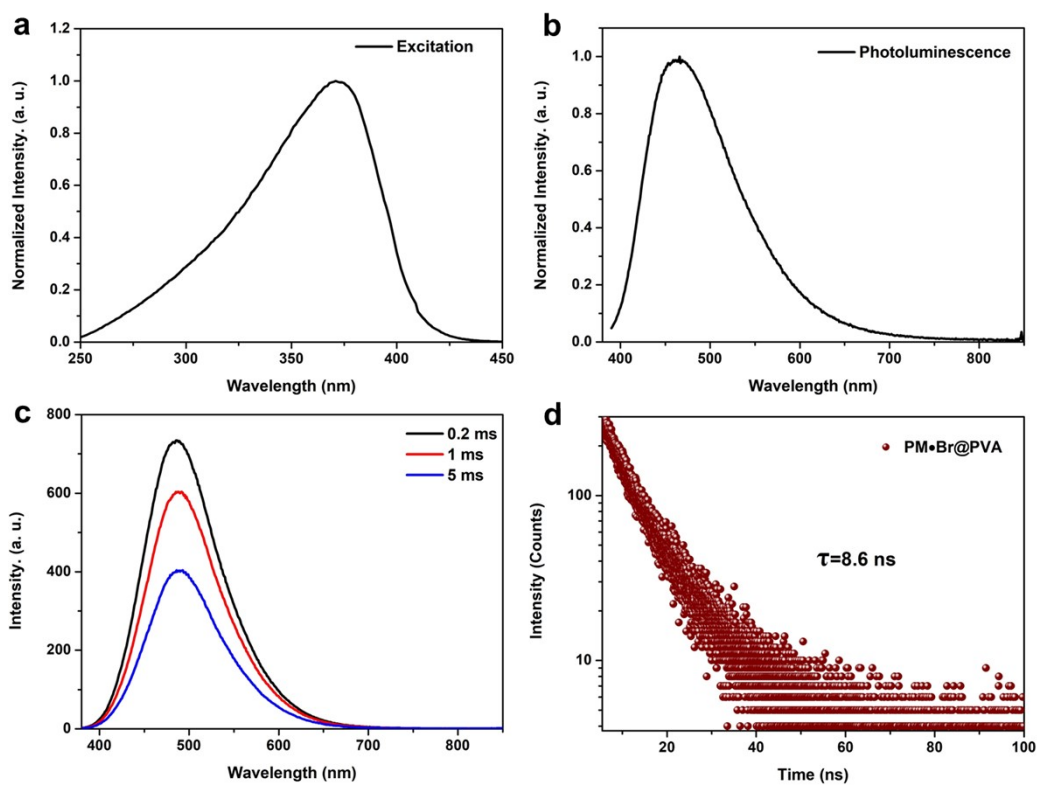

**Figure S11.** (a) Excitation spectra of PM•Br@PVA film at 469 nm; (b) Photoluminescence spectra of PM•Br@PVA film under 371 nm excitation; (c) Delayed PL spectra of PM•Br@PVA film with delay time of 0.2, 1 and 5 ms at 298 K under 371 nm excitation; (d) Time-resolved PL decay of PM•Cl@PVA film @464 nm.

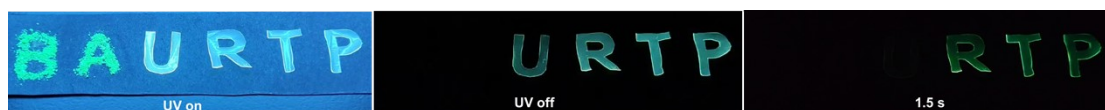

**Figure S12.** Luminescence photographs of information encryption.

## Reference:

1. S. Li, Z.-Y. Zhang, J.-F. Lv, L. Li, J. Li and C. Li, *J. Mater. Chem. A.*, 2023, **11**, 4957-4962.
